# Supplementary material
Source: bioRxiv or medRxiv preprint supplement (https://www.biorxiv.org/highwire/filestream/104184/field_highwire_adjunct_files/0/343046-1.pdf)
Supplement: Supplementary file [file 343046-1.pdf]

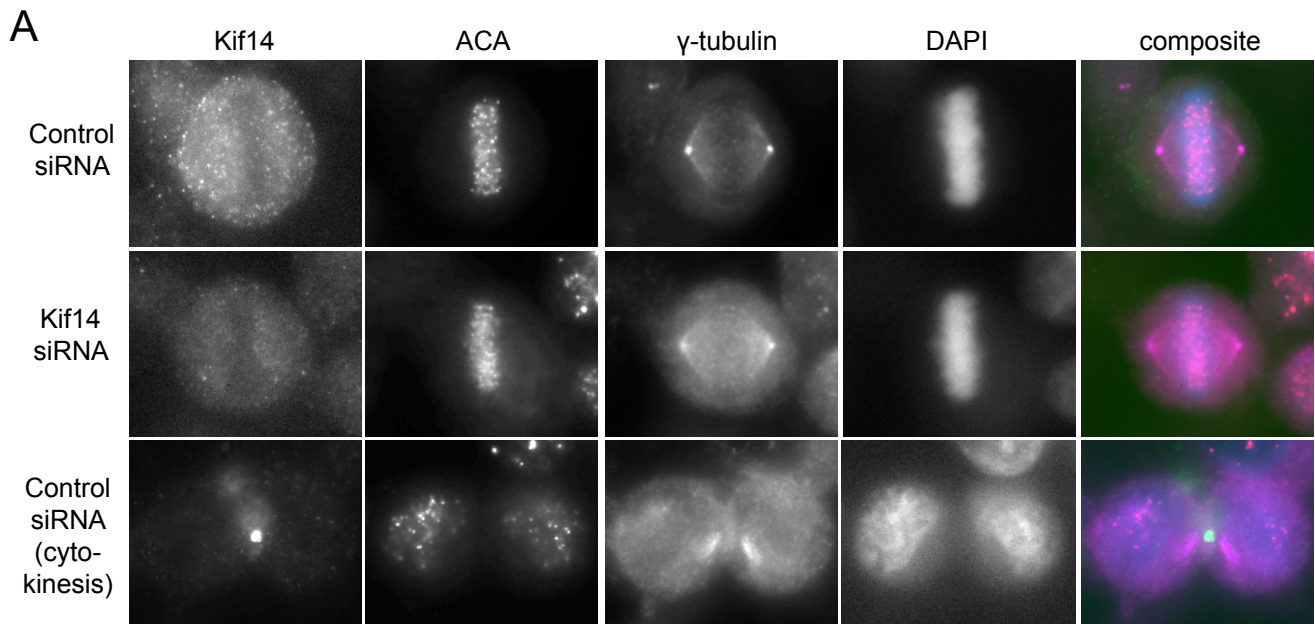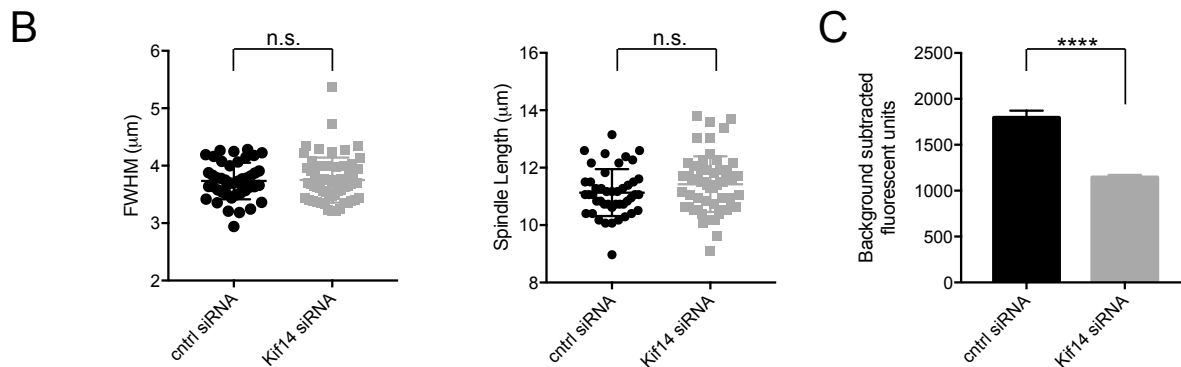

**Figure S1. Cells deficient in Kif14 do not effect chromosome alignment or spindle length in metaphase. (A)** Metaphase cells with endogenous Kif14 fluorescent antibody staining for control or Kif14 siRNA treatments. **(B)** Quantification of FWHM, spindle length, and background subtracted fluorescent intensity for both knockdown conditions. n.s., not significant; \*\*\*\*,  $p < 0.0001$  by unpaired t test. Data obtained from two independent data sets with the following cell numbers: control siRNA (45), Kif14 siRNA (60).

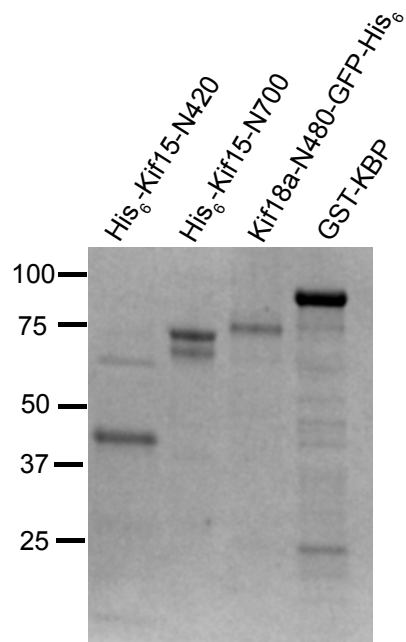

**Figure S2. Purification of kinesin and KBP proteins.** Coomassie stained gel of His<sub>6</sub>-Kif15-N420 (MW = 45 kDa), His<sub>6</sub>-Kif15-N700 (MW = 76 kDa), Kif18a-N480-GFP-His<sub>6</sub> (MW = 82 kDa) and GST-KBP (MW = 97 kDa). Molecular weight markers are indicated in kDa.

**A**

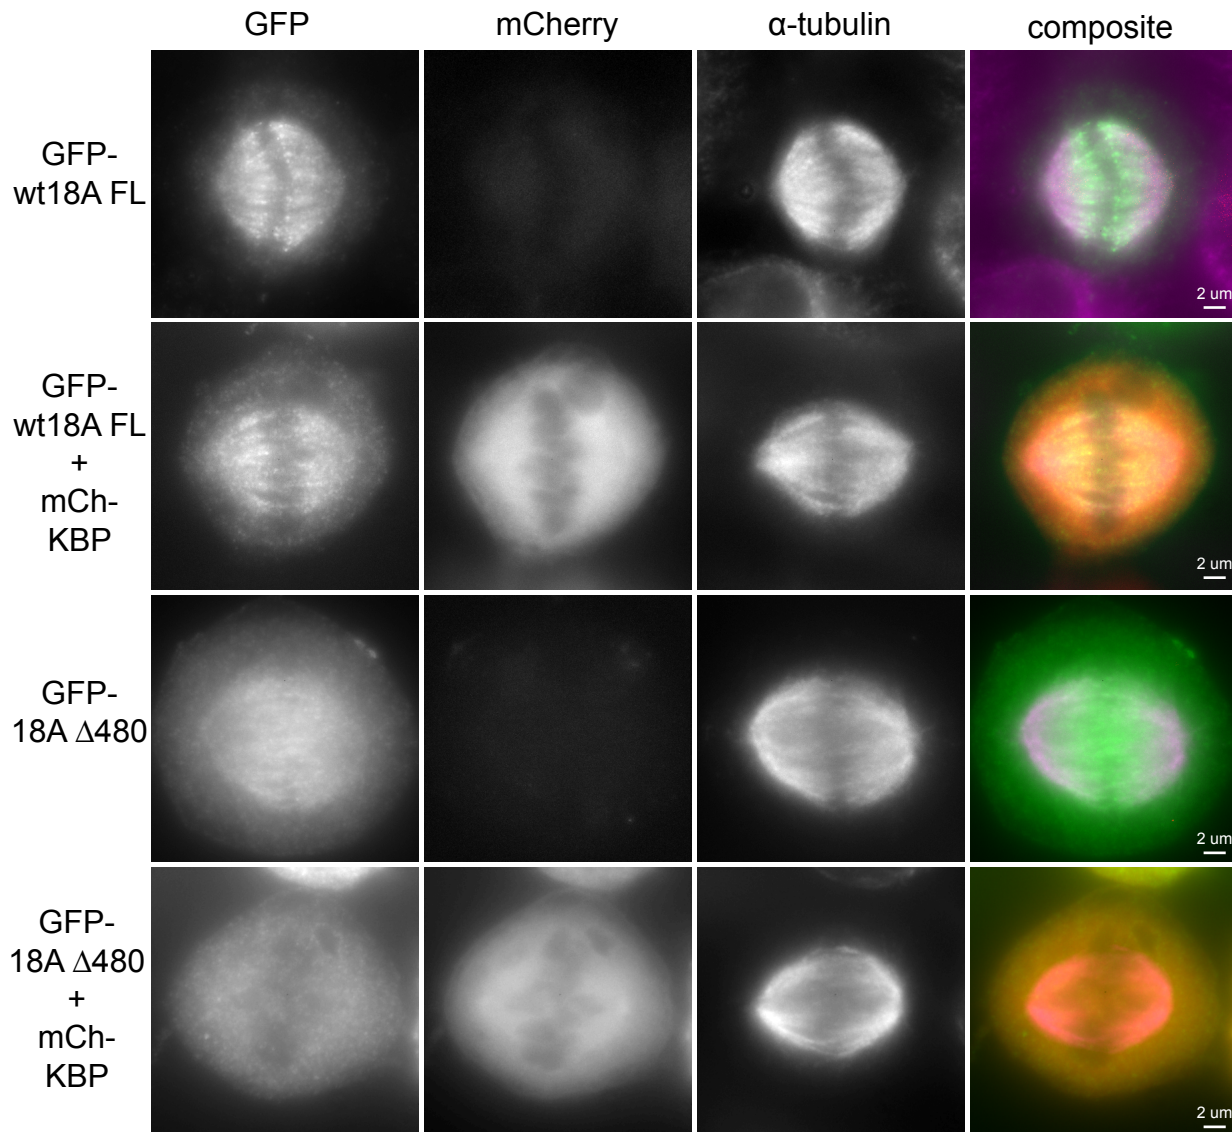

**B**

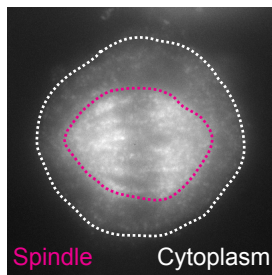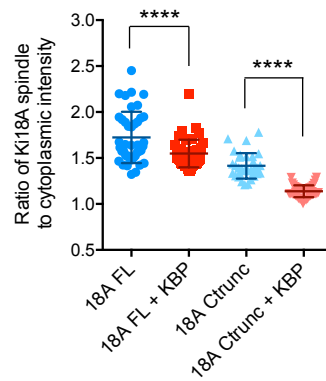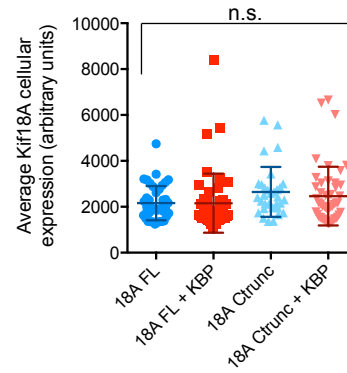

**Figure S3. Kif18A's C-terminal microtubule binding domain maintains spindle localization upon KBP overexpression.** (A) Metaphase cells transfected with GFP-tagged Kif18A full length (FL) or C-terminally truncated GFP-tagged Kif18A ( $\Delta$ 480) with or without mCh-KBP. (B) (left) Pictorial definition of areas used to define spindle and cytoplasmic GFP Kif18A fluorescent signal intensity. (middle) Quantification of background subtracted spindle to cytoplasmic ratio determined for each cell measured in each condition. \*\*\*\*, adjusted  $p < 0.0001$  with 95% confidence interval by one-way ANOVA with Tukey's multiple comparisons test. (right) Quantification of background subtracted average fluorescent intensity measured for each cell in each condition. n.s., not significant with 95% confidence interval by one-way ANOVA with Tukey's multiple comparisons test. Data obtained from three independent data sets with the following cell numbers: GFP Kif18A FL (41), GFP Kif18A FL + mCh KBP (47), GFP Kif18A  $\Delta$ 480 (32), GFP Kif18A  $\Delta$ 480 + mCh KBP (47).
